# Supplementary material for: Effect of a bridge unit on the mechanochromism of phenothiazine-based Schiff bases
Source: Royal Society of Chemistry journal article supplement (doi:10.1039/c9nj03881g), 2019-01-01
Supplement: c9nj03881g1.pdf [file c9nj03881g1.pdf]

Supporting information:

**Effect of Bridge Unit on Mechanochromism of Phenothiazine-Based Schiff Bases**

Zicheng Yang<sup>a</sup>, Pengchong Xue<sup>b,\*</sup>, Lulu Zhang<sup>a</sup>, Peng Chen<sup>a,\*</sup>

a: Key Laboratory of Functional Inorganic Material Chemistry (MOE), School of Chemistry and Materials Science, Heilongjiang University, Harbin, 150080, P. R. China.

b: Tianjin Key Laboratory of Structure and Performance for Functional Molecules, MOE Key Laboratory of Inorganic–Organic Hybrid Functional Material Chemistry College of Chemistry, Tianjin Normal University No. 393, Bin Shui West Road, Tianjin, P. R. China

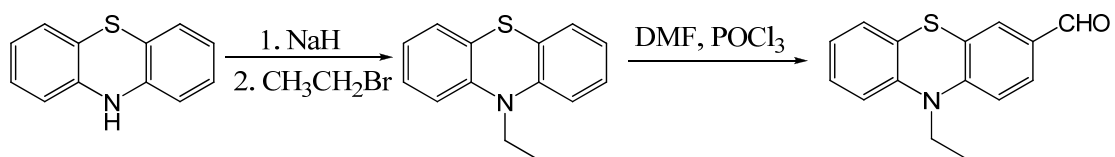

**Scheme S1.** The synthetic route for 10-ethyl-10H-phenothiazine-3-carbaldehyde.

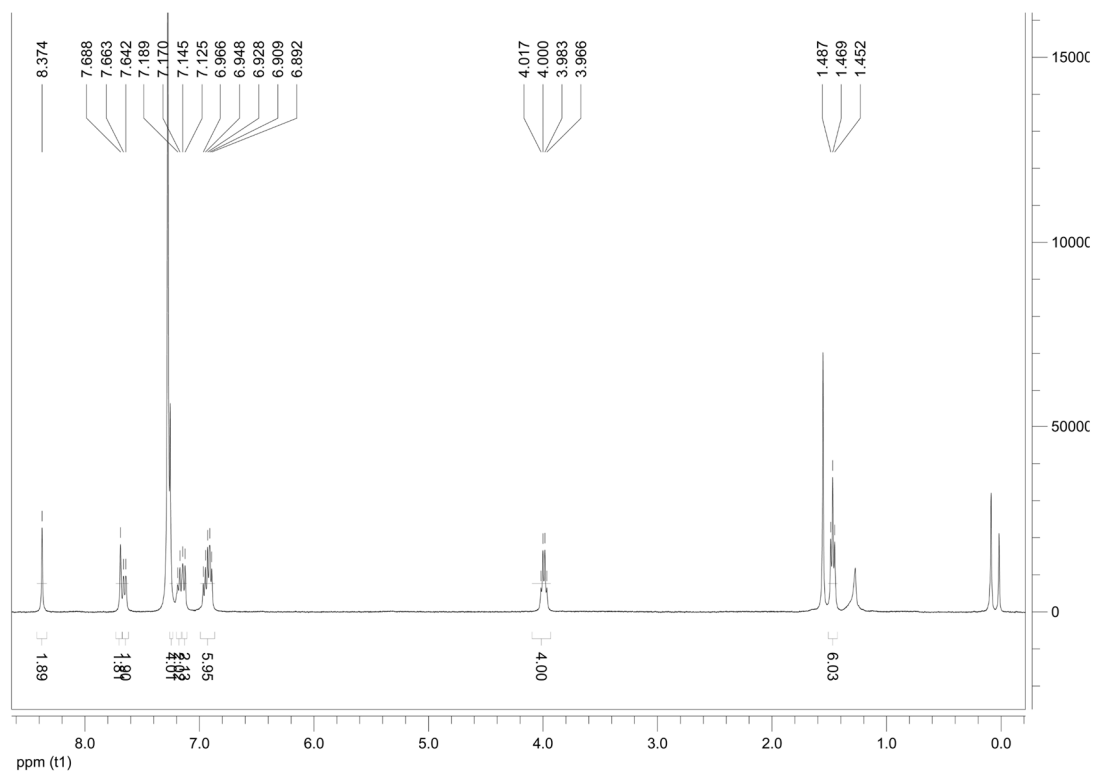

**Fig. S1** <sup>1</sup>H NMR (400 MHz, CDCl<sub>3</sub>) spectrum of PPD.

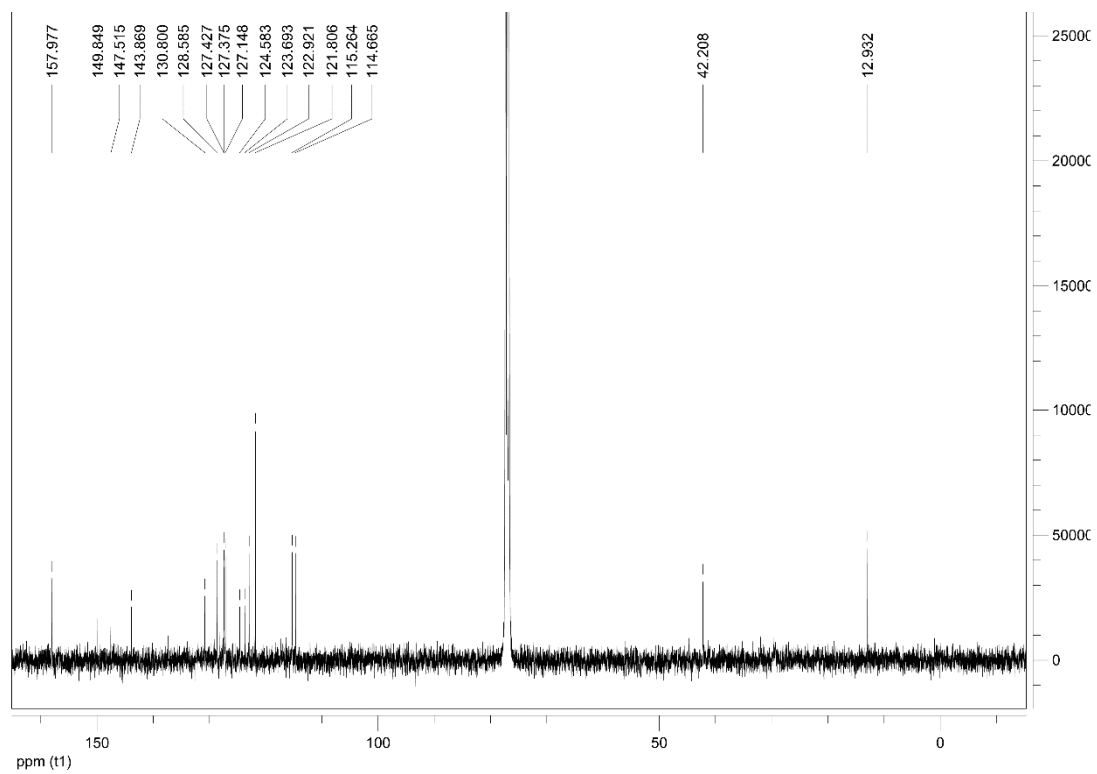

**Fig. S2**  $^{13}\text{C}$  NMR (100 MHz,  $\text{CDCl}_3$ ) spectrum of PPD.

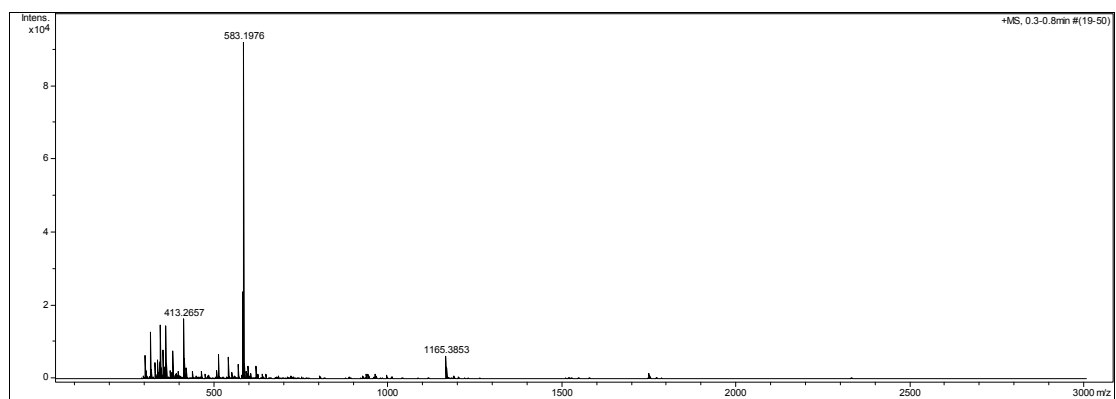

**Fig. S3** ESI-TOF-MS spectrum of PPD.

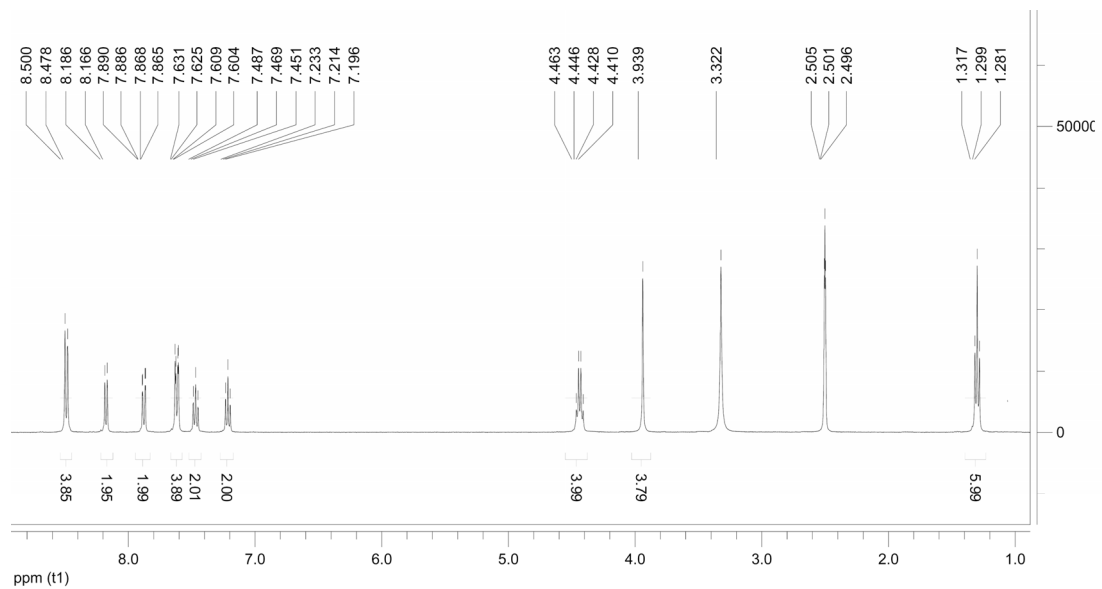

**Fig. S4**  $^1\text{H}$  NMR (400 MHz, DMSO) spectrum of PED.

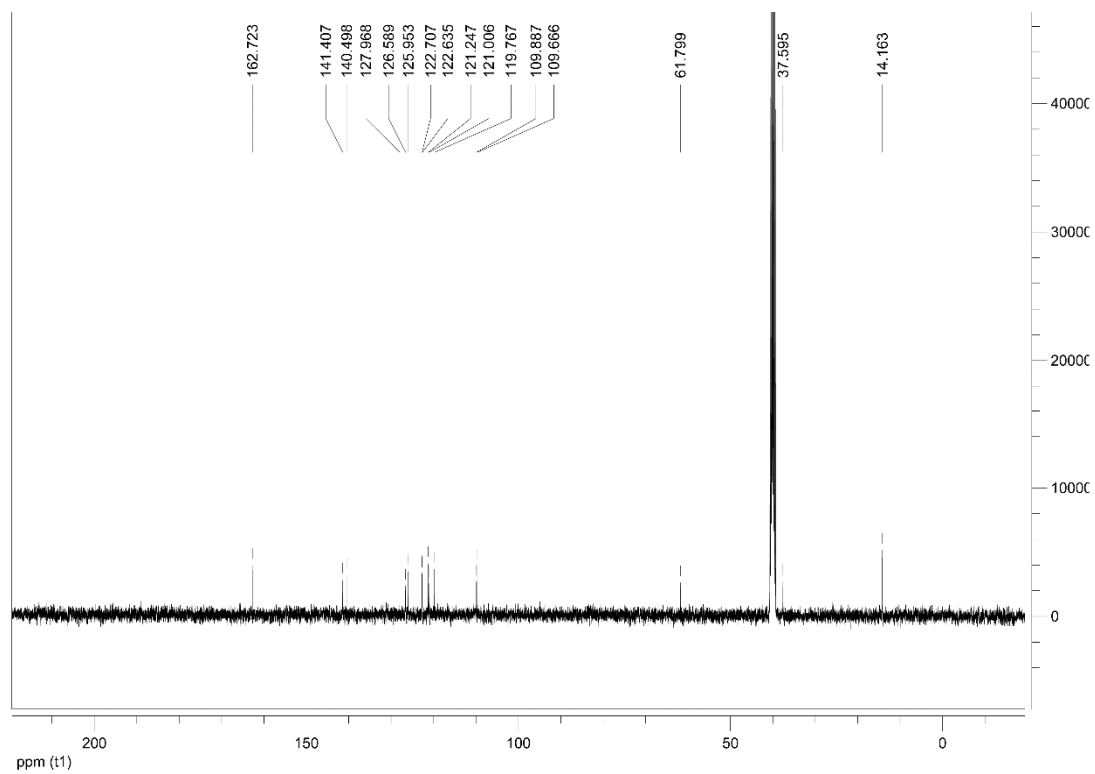

**Fig. S5**  $^{13}\text{C}$  NMR (100 MHz, DMSO) spectrum of PED.

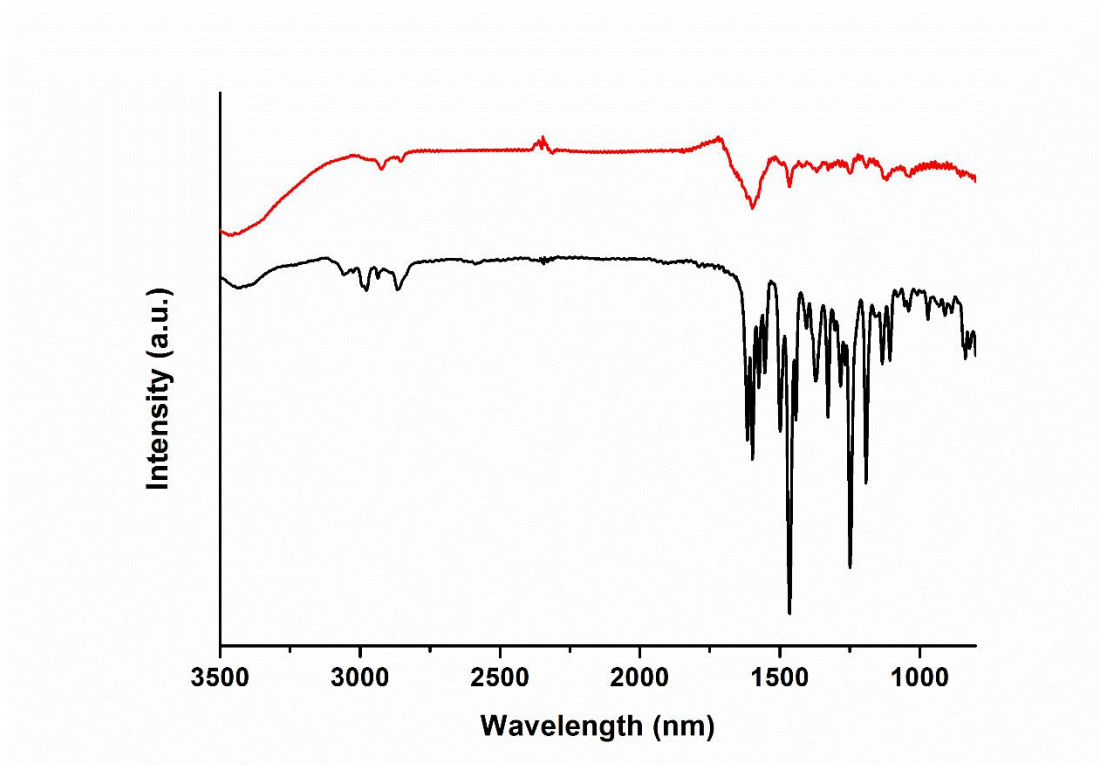

**Fig. S6** IR spectra of the ground PPD and fumed PPD.



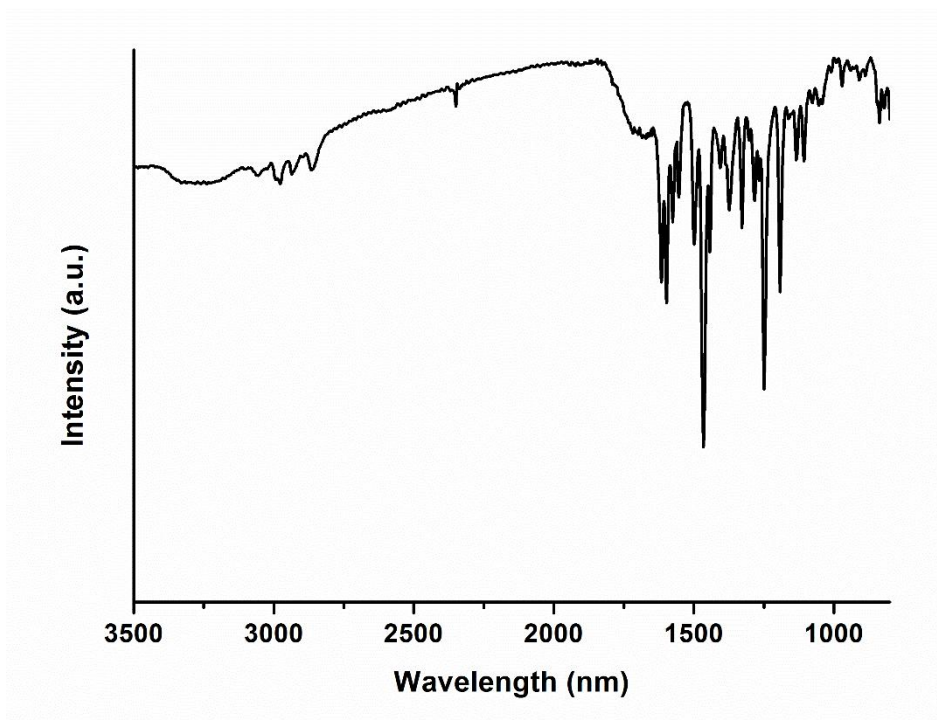

**Fig. S7** IR spectra of PED

**Table S1** Energy levels and  $E_g$  of PED and PPD from experiment and quantum chemical calculation.

|     | $E_{\text{HOMO}}$ (eV) <sup>a</sup> | $E_{\text{LUMO}}$ (eV) <sup>b</sup> | $E_g$ (eV) <sup>c</sup> | $E_{\text{HOMO}}$ (eV) <sup>d</sup> | $E_{\text{HOMO}}$ (eV) <sup>d</sup> |
|-----|-------------------------------------|-------------------------------------|-------------------------|-------------------------------------|-------------------------------------|
| PED | -5.22                               | -1.82                               | 3.50                    | -5.12                               | -1.20                               |
| PPD | -4.93                               | -2.32                               | 2.61                    | -4.94                               | -1.80                               |

<sup>a</sup> Electrochemical method was used to obtain the HOMO energy levels by comparing with an external reference, the ferrocene/ferrocenium ( $F_c/F_c^+$ , 4.8 eV relative to vacuum). <sup>b</sup> The LUMO energy level was estimated by the equation:  $E_{\text{LUMO}} = E_{\text{HOMO}} + E_g$ . <sup>c</sup>  $E_g$  was determined from the edge of the absorption spectrum. <sup>d</sup> They were obtained by quantum chemical calculation.

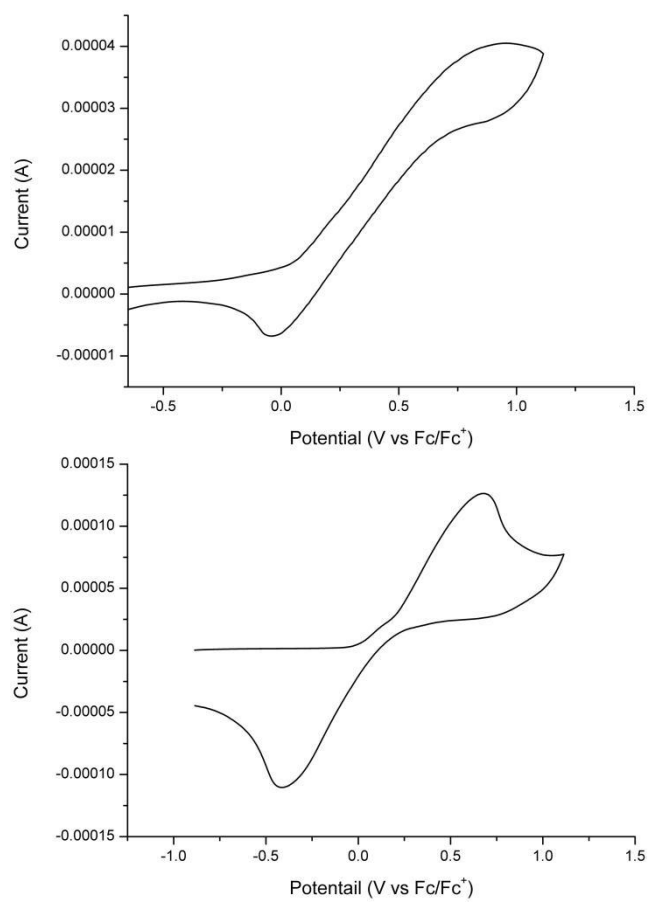

**Fig. S8** Cyclic voltammetry of (top) PED and (bottom) PPD

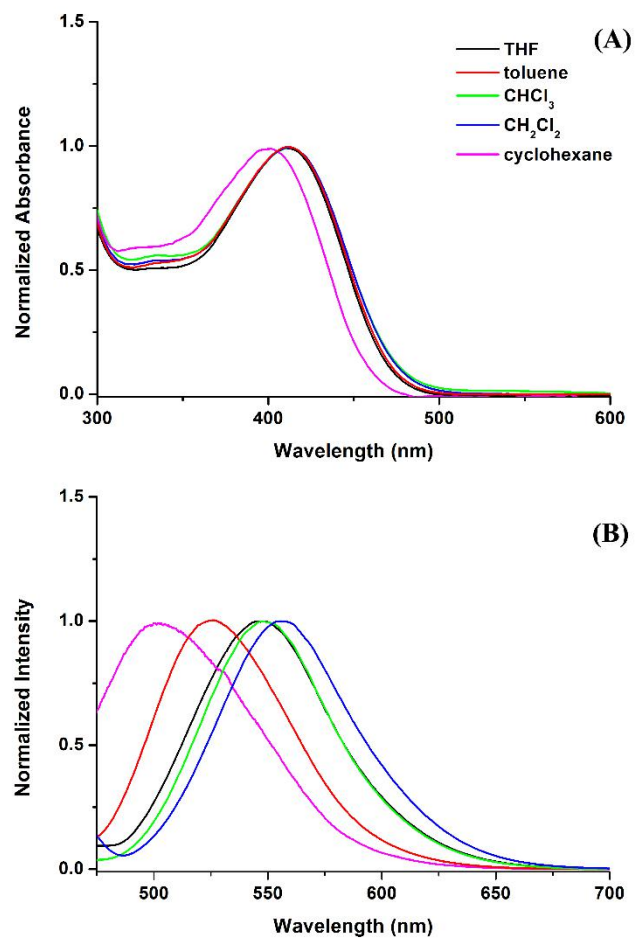

**Fig. S9** Normalized solvent-dependent absorption and emission spectra of PPD. Concentration for all examples is  $1.0 \times 10^{-5}$  M,  $\lambda_{em} = 400$  nm.

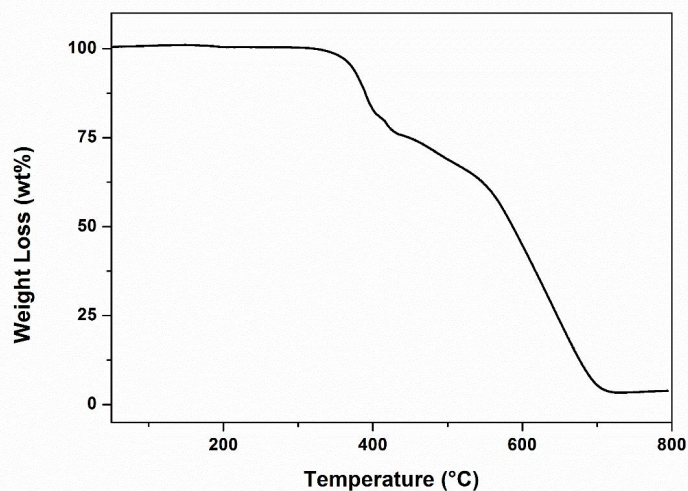

**Fig. S10** TG curve of PPD in the experimental range of 50-800 °C.

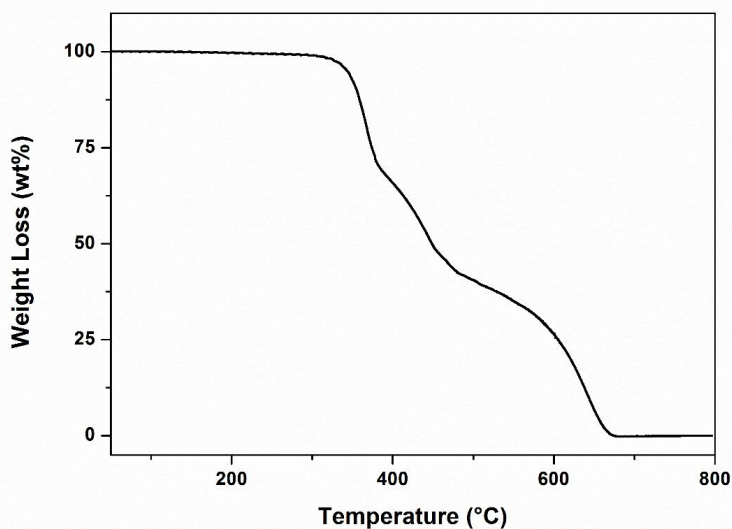

**Fig. S11** TG curve of PED in the experimental range of 50-800 °C.

Thermogravimetric analysis had been conducted in the experimental range of 50-800 °C. In the case of PPD, the first stage of weight loss occurred at 340 °C, which was a little higher than that of PED. A residue of 3.2 wt% was found, which would be ascribed to the incomplete calcination and residue carbon. In the case of PED, the first stage of weight loss started at 290 °C, and a residue of 0.30 wt% was detected.

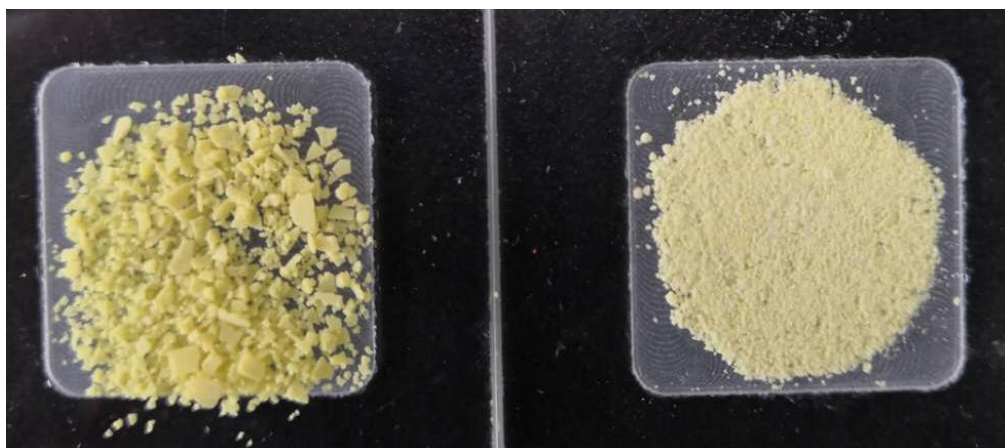

**Fig. S12** Photos of PED solid before (left) and after (right) grinding under natural light.

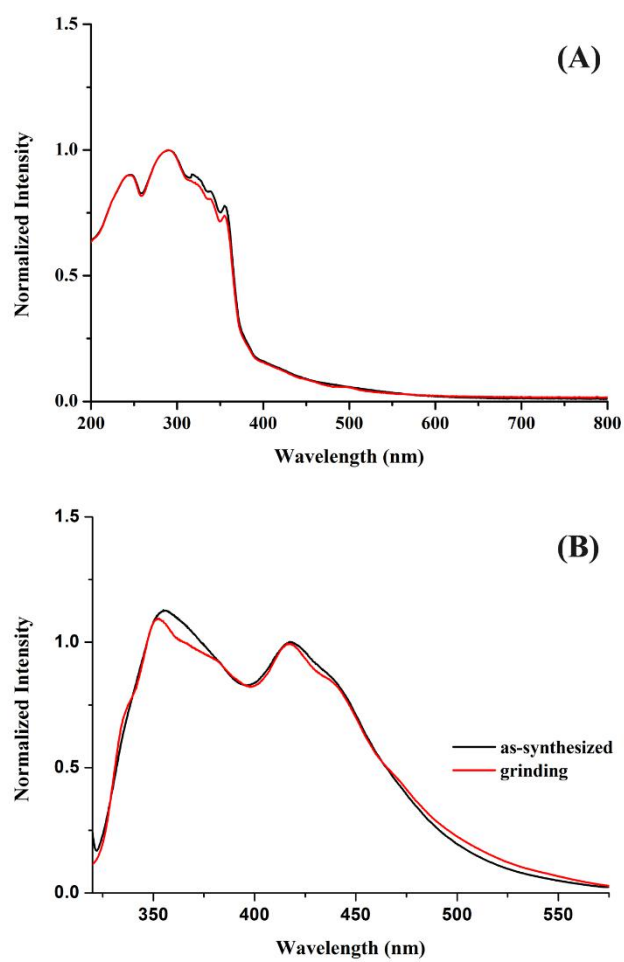

**Fig. S13** UV-vis absorption (A) and fluorescence (B) spectra of PED in solid.

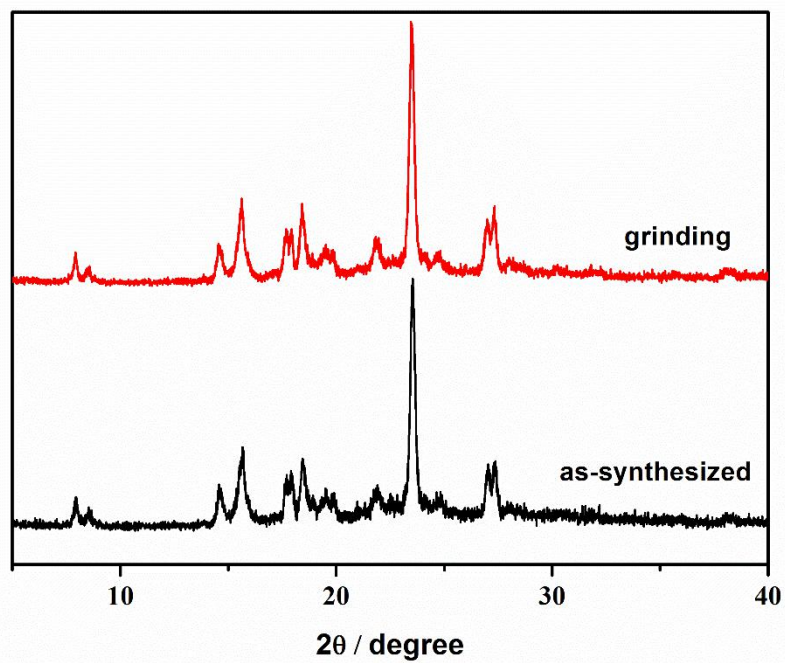

**Fig. S14** XRD pattern of the as-synthesized and grounded PED samples.
